# Supplementary material
Source: publisher figshare collection journal article supplement (https://acs.figshare.com/ndownloader/files/4081027)
Supplement: Supplementary file 1 [file 4081027]

data_Fe80                  
 

# CHEMICAL DATA
 

_chemical_name_common             'Sb-based filled skutterudite'
_chemical_formula_sum             'Fe2.9Ni0.6Sb11.6Sm0.58'
_chemical_formula_weight          1696.789
 
loop_
    _atom_type_symbol               
    _atom_type_scat_Cromer_Mann_a1 
    _atom_type_scat_Cromer_Mann_b1 
    _atom_type_scat_Cromer_Mann_a2 
    _atom_type_scat_Cromer_Mann_b2 
    _atom_type_scat_Cromer_Mann_a3 
    _atom_type_scat_Cromer_Mann_b3 
    _atom_type_scat_Cromer_Mann_a4 
    _atom_type_scat_Cromer_Mann_b4 
    _atom_type_scat_Cromer_Mann_c 
    _atom_type_scat_dispersion_real 
    _atom_type_scat_dispersion_imag 
    _atom_type_scat_source          
sb    19.64180   5.30340  19.04550   0.46070   5.03710  27.90740
       2.68270  75.28250   4.59090  -0.28700   5.89400
 International_Tables_for_Crystallography_Vol.C(1991)_Tables_6.1.1.4_and_6.1.1.5
fe    11.76950   4.76110   7.35730   0.30720   3.52220  15.35350
       2.30450  76.88050   1.03690  -1.17900   3.20400
 International_Tables_for_Crystallography_Vol.C(1991)_Tables_6.1.1.4_and_6.1.1.5
ni    12.83760   3.87850   7.29200   0.25650   4.44380  12.17630
       2.38000  66.34210   1.03410  -2.95600   0.50900
 International_Tables_for_Crystallography_Vol.C(1991)_Tables_6.1.1.4_and_6.1.1.5
sm    24.00420   2.47274  19.42580   0.19645  13.43960  14.39960
       2.89604 128.00700   2.20963  -5.69600  12.32000
 International_Tables_for_Crystallography_Vol.C(1991)_Tables_6.1.1.4_and_6.1.1.5
 
#=============================================================================
 
# POWDER SPECIMEN AND CRYSTAL DATA
 
_symmetry_cell_setting                Cubic
_symmetry_space_group_name_H-M       'I m -3'
_symmetry_space_group_name_Hall      '-I 2 2 3'
 
loop_
    _symmetry_equiv_pos_as_xyz   #<--must include 'x,y,z'
'x,y,z'
'x,-y,-z'
'-x,y,-z'
'-x,-y,z'
'y,z,x'
'-y,-z,x'
'y,-z,-x'
'-y,z,-x'
'z,x,y'
'-z,x,-y'
'-z,-x,y'
'z,-x,-y'
'-x,-y,-z'
'-x,y,z'
'x,-y,z'
'x,y,-z'
'-y,-z,-x'
'y,z,-x'
'-y,z,x'
'y,-z,x'
'-z,-x,-y'
'z,-x,y'
'z,x,-y'
'-z,x,y'
'x+1/2,y+1/2,z+1/2'
'x+1/2,-y+1/2,-z+1/2'
'-x+1/2,y+1/2,-z+1/2'
'-x+1/2,-y+1/2,z+1/2'
'y+1/2,z+1/2,x+1/2'
'-y+1/2,-z+1/2,x+1/2'
'y+1/2,-z+1/2,-x+1/2'
'-y+1/2,z+1/2,-x+1/2'
'z+1/2,x+1/2,y+1/2'
'-z+1/2,x+1/2,-y+1/2'
'-z+1/2,-x+1/2,y+1/2'
'z+1/2,-x+1/2,-y+1/2'
'-x+1/2,-y+1/2,-z+1/2'
'-x+1/2,y+1/2,z+1/2'
'x+1/2,-y+1/2,z+1/2'
'x+1/2,y+1/2,-z+1/2'
'-y+1/2,-z+1/2,-x+1/2'
'y+1/2,z+1/2,-x+1/2'
'-y+1/2,z+1/2,x+1/2'
'y+1/2,-z+1/2,x+1/2'
'-z+1/2,-x+1/2,-y+1/2'
'z+1/2,-x+1/2,y+1/2'
'z+1/2,x+1/2,-y+1/2'
'-z+1/2,x+1/2,y+1/2'
 
_cell_length_a                       9.1165(2)
_cell_length_b                       9.1165(2)
_cell_length_c                       9.1165(2)
_cell_angle_alpha                    90.00000
_cell_angle_beta                     90.00000
_cell_angle_gamma                    90.00000
_cell_volume                         757.68(5)
_cell_formula_units_Z                2
_cell_measurement_temperature        298

 
_pd_spec_size_thick                  0.01

_pd_spec_mounting                         'zero-background sample holder'

_pd_spec_mount_mode                       'reflection'
_pd_spec_shape                            'flat_sheet'
_pd_char_colour                           'grey'
 

_pd_prep_pressure                         101
_pd_prep_temperature                      1223
 
#=============================================================================
 
# EXPERIMENTAL DATA
 

_pd_instr_location
; Bragg-Brentano powder diffractometer, Department of Chemistry and 
Industrial Chemistry, University of Genova, Italy 
;
_pd_calibration_special_details           'calibration with silicon'

 
_diffrn_ambient_temperature          298
_diffrn_source                   'sealed X-ray tube' 
_diffrn_radiation_type           'X-ray'
_diffrn_radiation_wavelength      1.789190
_diffrn_source_target             'Co'
 
_diffrn_measurement_device_type      'Philips PW1050/81'
_pd_meas_scan_method                 'step'

 
#  The following four items give details of the measured (not processed)
#  powder pattern.  Angles are in degrees.
 
_pd_meas_number_of_points         5083
_pd_meas_2theta_range_min         8.00000
_pd_meas_2theta_range_max         110.00000
_pd_meas_2theta_range_inc         0.020077
 
#=============================================================================
 
# REFINEMENT DATA
 

 
_pd_proc_ls_profile_function      'Pseudo-Voigt'
_pd_proc_ls_background_function   
;
linear interpolation between a set of background points with refinable heights
;

 
_pd_proc_ls_prof_R_factor                5.1551
_pd_proc_ls_prof_wR_factor               7.2029
_pd_proc_ls_prof_wR_expected             4.0973
 
_pd_proc_ls_prof_cR_factor               29.6946
_pd_proc_ls_prof_cwR_factor              21.8923
_pd_proc_ls_prof_cwR_expected            12.4534
 
_pd_proc_ls_prof_chi2                 3.0904
_pd_proc_ls_prof_echi2                3.2200
 
_refine_ls_R_I_factor                 9.1556
_refine_ls_number_reflns                   206
_refine_ls_number_parameters                34
_refine_ls_number_restraints                 0
_refine_ls_goodness_of_fit_all           1.758
_refine_ls_shift/su_max                   0.01
 
_pd_proc_2theta_range_min                8.0142
_pd_proc_2theta_range_max              110.0142
_pd_proc_2theta_range_inc              0.020077
_pd_proc_wavelength                    1.540590
 
_computing_structure_refinement      FULLPROF
 
#=============================================================================
 
# ATOMIC COORDINATES AND DISPLACEMENT PARAMETERS
 
loop_
    _atom_site_label
    _atom_site_fract_x
    _atom_site_fract_y
    _atom_site_fract_z
    _atom_site_U_iso_or_equiv
    _atom_site_occupancy
    _atom_site_adp_type              # Not in version 2.0.1
    _atom_site_type_symbol
 Sb  0.00000  0.15887(7)  0.33538(6)  0.00270  0.967(2) Uiso Sb  
 Fe  0.25000  0.25000  0.25000  0.00334  0.72500 Uiso Fe  
 Ni  0.25000  0.25000  0.25000  0.00334  0.15000 Uiso Ni  
 Sm  0.00000  0.00000  0.00000  0.01581  0.58000 Uiso Sm  
 
#=============================================================================#
#                       MOLECULAR GEOMETRY                                    #
#=============================================================================#
loop_
   _geom_bond_atom_site_label_1
   _geom_bond_atom_site_label_2
   _geom_bond_distance
   _geom_bond_site_symmetry_2
   _geom_bond_publ_flag
Sb    Sb    3.00152       3_556 ?
Sb    Sb    2.89668       4_555 ?
Sb    Fe    2.54764           . ?
Sb    Fe    2.54764      14_555 ?
Sb    Ni    2.54764           . ?
Sb    Ni    2.54764      14_555 ?
Fe    Sb    2.54764           . ?
Fe    Sb    2.54764       5_555 ?
Fe    Sb    2.54764       9_555 ?
Fe    Sb    2.54764      26_555 ?
Fe    Sb    2.54764      30_555 ?
Fe    Sb    2.54764      34_555 ?
Ni    Sb    2.54764           . ?
Ni    Sb    2.54764       5_555 ?
Ni    Sb    2.54764       9_555 ?
Ni    Sb    2.54764      26_555 ?
Ni    Sb    2.54764      30_555 ?
Ni    Sb    2.54764      34_555 ?

loop_
   _geom_angle_atom_site_label_1
   _geom_angle_atom_site_label_2
   _geom_angle_atom_site_label_3
   _geom_angle
   _geom_angle_site_symmetry_1
   _geom_angle_site_symmetry_3
   _geom_angle_publ_flag
 Sb   Sb   Sb   90.00001       1_556    2_555 ?
 Sb   Sb   Fe   107.78973      1_556    3_555 ?
 Sb   Sb   Fe   107.78973      1_556    4_555 ?
 Sb   Sb   Ni   107.78973      1_556    5_555 ?
 Sb   Sb   Ni   107.78973      1_556    6_555 ?
 Sb   Sb   Fe   109.03227      2_555    3_555 ?
 Sb   Sb   Fe   109.03227      2_555    4_555 ?
 Sb   Sb   Ni   109.03227      2_555    5_555 ?
 Sb   Sb   Ni   109.03227      2_555    6_555 ?
 Fe   Sb   Fe   126.91479      3_555    4_555 ?
 Fe   Sb   Ni   126.91479      3_555    6_555 ?
 Fe   Sb   Ni   126.91479      4_555    5_555 ?
 Ni   Sb   Ni   126.91479      5_555    6_555 ?
 Sb   Fe   Sb   94.65894           .    2_555 ?
 Sb   Fe   Sb   94.65895           .    3_555 ?
 Sb   Fe   Sb   180.00000          .    4_666 ?
 Sb   Fe   Sb   85.34104           .    5_666 ?
 Sb   Fe   Sb   85.34105           .    6_666 ?
 Sb   Fe   Sb   94.65894       2_555    3_555 ?
 Sb   Fe   Sb   85.34104       2_555    4_666 ?
 Sb   Fe   Sb   180.00000      2_555    5_666 ?
 Sb   Fe   Sb   85.34104       2_555    6_666 ?
 Sb   Fe   Sb   85.34105       3_555    4_666 ?
 Sb   Fe   Sb   85.34104       3_555    5_666 ?
 Sb   Fe   Sb   180.00000      3_555    6_666 ?
 Sb   Fe   Sb   94.65894       4_666    5_666 ?
 Sb   Fe   Sb   94.65895       4_666    6_666 ?
 Sb   Fe   Sb   94.65894       5_666    6_666 ?
 Sb   Ni   Sb   94.65894           .    2_555 ?
 Sb   Ni   Sb   94.65895           .    3_555 ?
 Sb   Ni   Sb   180.00000          .    4_666 ?
 Sb   Ni   Sb   85.34104           .    5_666 ?
 Sb   Ni   Sb   85.34105           .    6_666 ?
 Sb   Ni   Sb   94.65894       2_555    3_555 ?
 Sb   Ni   Sb   85.34104       2_555    4_666 ?
 Sb   Ni   Sb   180.00000      2_555    5_666 ?
 Sb   Ni   Sb   85.34104       2_555    6_666 ?
 Sb   Ni   Sb   85.34105       3_555    4_666 ?
 Sb   Ni   Sb   85.34104       3_555    5_666 ?
 Sb   Ni   Sb   180.00000      3_555    6_666 ?
 Sb   Ni   Sb   94.65894       4_666    5_666 ?
 Sb   Ni   Sb   94.65895       4_666    6_666 ?
 Sb   Ni   Sb   94.65894       5_666    6_666 ?
